# Supplementary material for: Binaphthyl-derived armchair-type molecular carbon rings with chirality: synthesis and optical properties
Source: Royal Society of Chemistry journal article supplement (doi:10.1039/d2qo01977a), 2022-12-23
Supplement: d2qo01977a1.pdf [file d2qo01977a1.pdf]

*Supporting Information*

**Binaphthyl-Derived Armchair-type Molecular Carbon Rings with  
Chirality: Synthesis, and Optical Properties**

Qiang Huang,<sup>a</sup> Jinling Zhang,<sup>b</sup> Huafeng Chen,<sup>b</sup> Xin Kong,<sup>a</sup> Peng Xu,<sup>\*b</sup> and Pingwu  
Du<sup>\*a</sup>

<sup>a</sup> Hefei National Research Center for Physical Sciences at the Microscale, Anhui  
Laboratory of Advanced Photon Science and Technology, CAS Key Laboratory of  
Materials for Energy Conversion, Department of Materials Science and Engineering,  
University of Science and Technology of China, 96 Jinzhai Road, Hefei, Anhui  
Province, 230026, China

E-mail: [dupingwu@ustc.edu.cn](mailto:dupingwu@ustc.edu.cn)

<sup>b</sup> Department of Chemistry, Chongqing University of Science and Technology,  
Chongqing 401331, China

E-mail: [xupeng@cqust.edu.cn](mailto:xupeng@cqust.edu.cn)

**General.** All the air-sensitive reactions were performed in an oven-dried vessel under argon atmosphere. NMR spectra were collected on a Bruker BioSpin ( $^1\text{H}$  400 MHz,  $^{13}\text{C}$  100 MHz) spectrometer for  $\text{CDCl}_3$  solution of a sample. Chemical shift values were expressed in parts per million (ppm) relative to  $\text{CDCl}_3$  ( $\delta$  7.26 ppm for  $^1\text{H}$  NMR and 77.16 ppm for  $^{13}\text{C}$  NMR). Flash chromatography was performed on silica gel (200-300 mesh). High-resolution MALDI-TOF mass spectra were measured on a Bruker Daltonics Inc. LTQ Orbitrap XL hybrid Fourier Transform high-resolution Mass Spectrometer. UV-vis spectra were collected on a UNIC-3802 spectrophotometer in standard glass cuvettes. Circular dichroism (CD) spectra were obtained on a spectropolarimeter (JASCO, Jasco-810).

**Materials.** All reagents were obtained from Innochem or Sigma Aldrich and used without further purification unless otherwise indicated. All organic solvents (THF, Toluene,  $\text{CHCl}_2$ , MeOH, EtOH,  $\text{Et}_2\text{O}$ , and 1,4-dioxane) were purchased from China Medicine Shanghai Chemical Reagent Co.

## 1. Synthesis

**(R/S)-4,4'-dibromo-6,6'-dichloro-2,2'-diethoxy-1,1'-binaphthalene (1 (R/S)).** The material **1 (R/S)** was synthesized according to literature reports.<sup>S1-S2</sup>

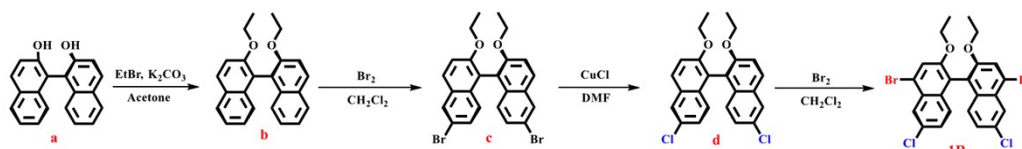

**(R/S)-2,2'-(6,6'-dichloro-2,2'-diethoxy-[1,1'-binaphthalene]-4,4'-diyl)bis(4,4,5,5-tetramethyl-1,3,2-dioxaborolane) (2 (R/S)).** A 250-mL flask containing **1 (R/S)** (1.50 g, 2.65 mmol),  $\text{Pd}(\text{dppf})\text{Cl}_2$  (95 mg, 130  $\mu\text{mol}$ ), dried KOAc (1.30 g, 13.3 mmol), and bis(pinacolato)diboron (2.64 g, 10.4 mmol) was evacuated and filled with argon three times, dry 1,4-dioxane (10 mL) was transferred to the flask *via* syringe under nitrogen at room temperature. The mixture was then stirred at 90  $^\circ\text{C}$  for 48 h. After cooling down to room temperature, solvent was removed and residual was purified by silica gel column chromatography ( $n$ -hexane/ $\text{CH}_2\text{Cl}_2$  = 0.3), affording **2 (R/S)** as white powder (1.3 g, 74%).  $^1\text{H}$  NMR ( $\text{CDCl}_3$ , 400 MHz, 298 K, ppm):  $\delta$  8.82 (s, 2H), 8.01 (s, 2H),

7.13 (dd,  $J = 10$  Hz, 1.2 Hz, 2H), 7.01 (d,  $J = 8.8$  Hz, 2H), 4.14-4.08 (m, 4H), 1.49 (s, 24H), 1.07 (t,  $J = 6.9$  Hz, 6H).  $^{13}\text{C}$  NMR ( $\text{CDCl}_3$ , 100 MHz, 298 K, ppm):  $\delta$  153.68, 133.51, 132.46, 130.03, 127.35, 127.26, 126.75, 125.59, 124.07, 84.24, 65.27, 25.13, 15.16. HR-MS (MALDI-TOF)  $m/z$  calcd. for  $\text{C}_{36}\text{H}_{42}\text{B}_2\text{Cl}_2\text{O}_6$   $[\text{M}]^+$ : 662.2545, found: 662.2504. FT-IR (KBr):  $\nu_{\text{max}}$  3092, 3073, 2979, 2933, 2885, 1905, 1775, 1727, 1578, 1500, 1455, 1379, 1354, 1333, 1313, 1255, 1218, 1187, 1165, 1142, 1114, 1091, 1062, 1010, 978, 954, 924, 896, 874, 854, 822, 810, 773, 747  $\text{cm}^{-1}$ .

**Synthesis of compound 3.** Compound **3** were prepared according to the published procedures.<sup>S3</sup>

**Synthesis of compound 4 (R/S).** To a degassed suspension of **2 (R/S)** (133 mg, 201  $\mu\text{mol}$ ), **3** (174 mg, 201  $\mu\text{mol}$ ), and KOH (56 mg, 1.00 mmol) in THF/ $\text{H}_2\text{O}$  (150 mL/15 mL) was added  $\text{Pd}(\text{PPh}_3)_4$  (10 mg, 8.65  $\mu\text{mol}$ ), then the mixture was further degassed for 0.5 h. The mixture was then heated up to 80  $^\circ\text{C}$  for 48 h under nitrogen atmosphere. After cooling down to room temperature, water was added and the mixture was extracted with DCM. The combined organic layer was dried over anhydrous  $\text{MgSO}_4$ , filtered and concentrated under reduced pressure to afford crude product **4 (R/S)** as a white solid for the next step without further purification.

**Synthesis of RCR and SCR** To a round-bottom flask (50 mL, vessel A) containing a magnetic stirring bar were added sodium metal (274 mg, 11.9 mmol), dry THF (12 mL) and naphthalene (1.00 g, 7.81 mmol), and the resultant mixture was stirred at room temperature for 1 day. To a 250-mL round-bottom flask (vessel B) containing a magnetic stirring bar were added the dry crude product **4 (R/S)** and dry THF (20 mL). Then a solution of sodium naphthalide in vessel A was added at -78  $^\circ\text{C}$ . After stirring at -78  $^\circ\text{C}$  for 2 h, 1.5 mL of  $\text{I}_2$  solution (1 M in THF) was added. After warming up to room temperature, the mixture was quenched with aqueous saturated sodium thiosulfate, extracted with  $\text{CH}_2\text{Cl}_2$ , dried over anhydrous  $\text{MgSO}_4$ , and concentrated under reduced pressure. The crude product was purified by column chromatography with hexane/ $\text{CH}_2\text{Cl}_2$  as the eluent (v/v, 1:1), the cyclic product was collected, further purification by recrystallization from MeOH and *n*-hexane to afford the pure **RCR/SCR**. (17 mg, 9.7 %) as a yellow solid.  $^1\text{H}$  NMR ( $\text{CDCl}_3$ , 400 MHz, 298 K, ppm):

$\delta$  8.33-8.29 (m, 2H), 7.96-7.93 (m, 2H), 7.67-7.42 (m, 32H), 6.50 (s, 2H), 3.35-3.28 (m, 2H), 2.78-2.71 (m, 2H), 0.25 (t,  $J = 6.8$  Hz, 6H).  $^{13}\text{C}$  NMR ( $\text{CDCl}_3$ , 100 MHz, 298 K, ppm):  $\delta$  154.14, 141.41, 140.75, 138.55, 138.28, 138.12, 137.97, 137.86, 137.34, 128.22, 127.59, 127.54, 127.46, 127.43, 127.34, 127.20, 126.51, 126.23, 125.81, 124.00, 121.88, 120.37, 65.27, 14.43. HR-MS (MALDI-TOF)  $m/z$  calcd. for  $\text{C}_{66}\text{H}_{48}\text{O}_2$   $[\text{M}]^+$ : 872.3654, found 872.3649. FT-IR (KBr):  $\nu_{\text{max}}$  2965, 2924, 2850, 1738, 1625, 1462, 1389, 1262, 1095, 1018, 813  $\text{cm}^{-1}$ .

## 2. MALDI-TOF-MS spectrum

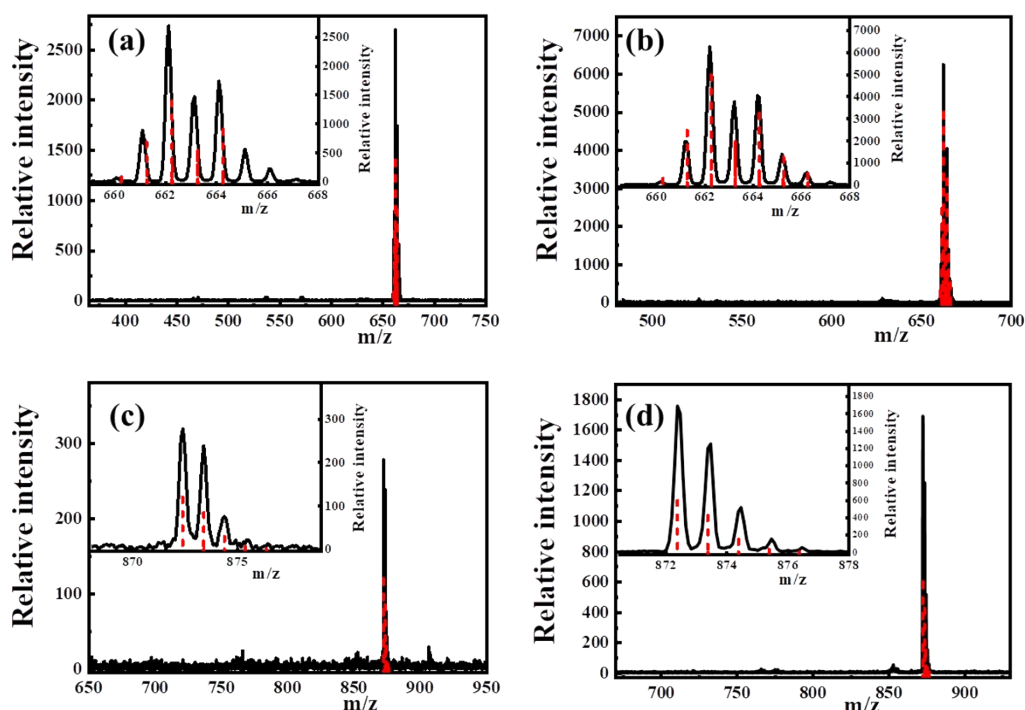

**Figure S1.** MALDI-TOF-MS spectrum and simulated data for **2R** (a), **2S** (b), **RCR** (c), and **SCR** (d).

## 3. $^1\text{H}$ NMR and $^{13}\text{C}$ NMR copies for new compounds

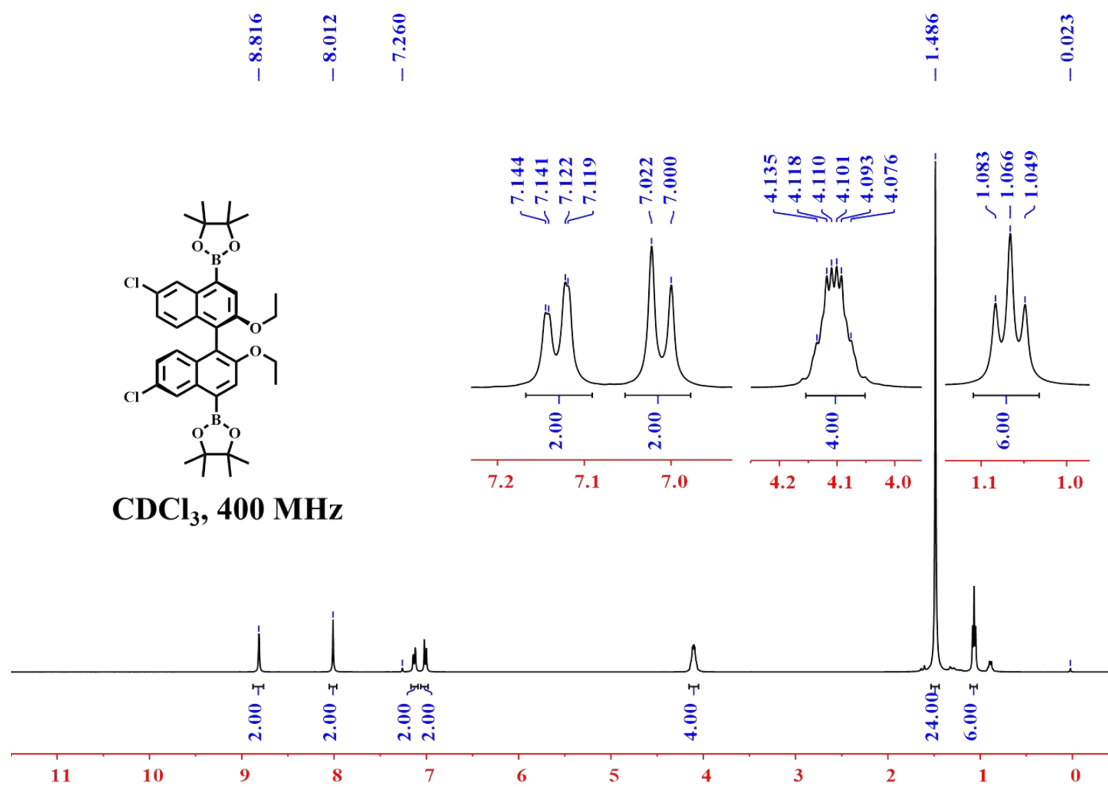

Figure S2. <sup>1</sup>H NMR spectrum of **2R**.

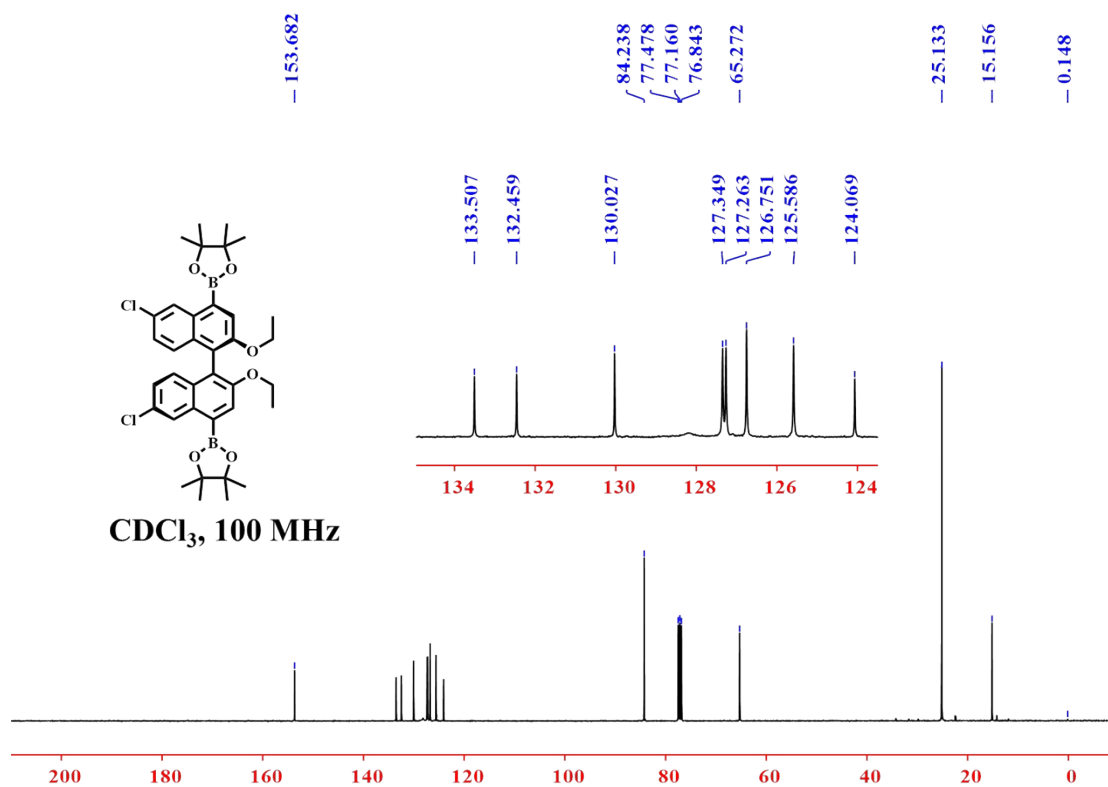

Figure S3. <sup>13</sup>C NMR spectrum **2R**.

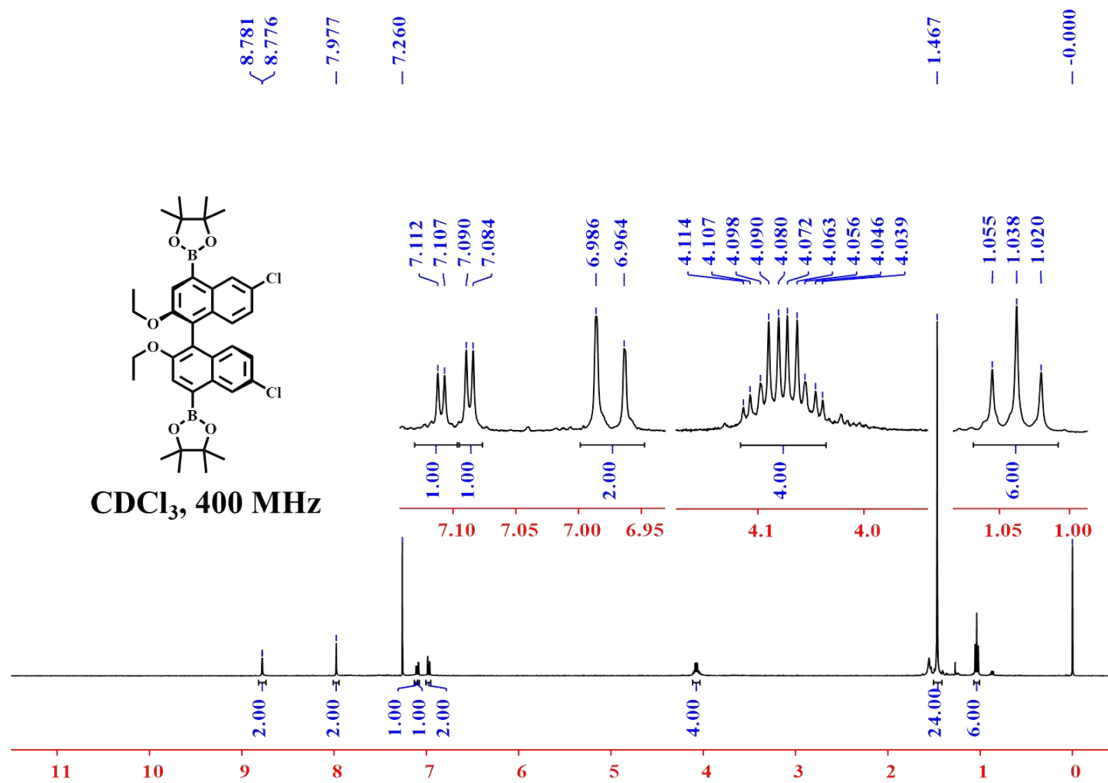

Figure S4. <sup>1</sup>H NMR spectrum of 2S.

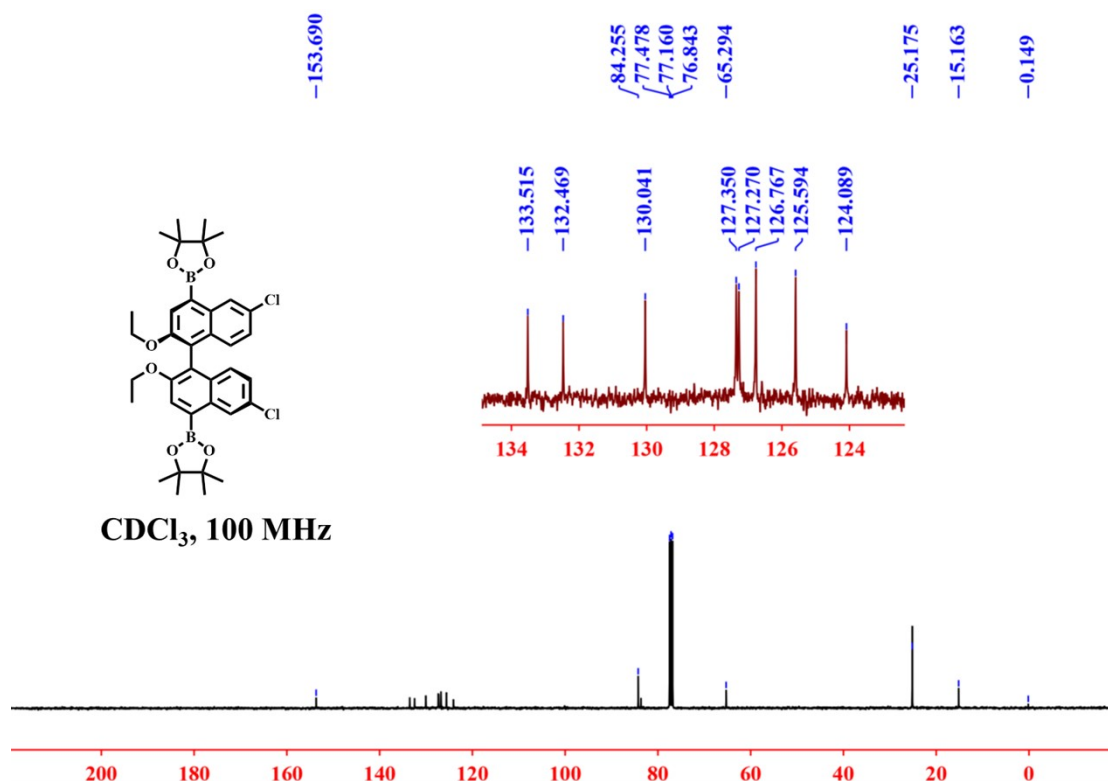

Figure S5. <sup>13</sup>C NMR spectrum 6S.

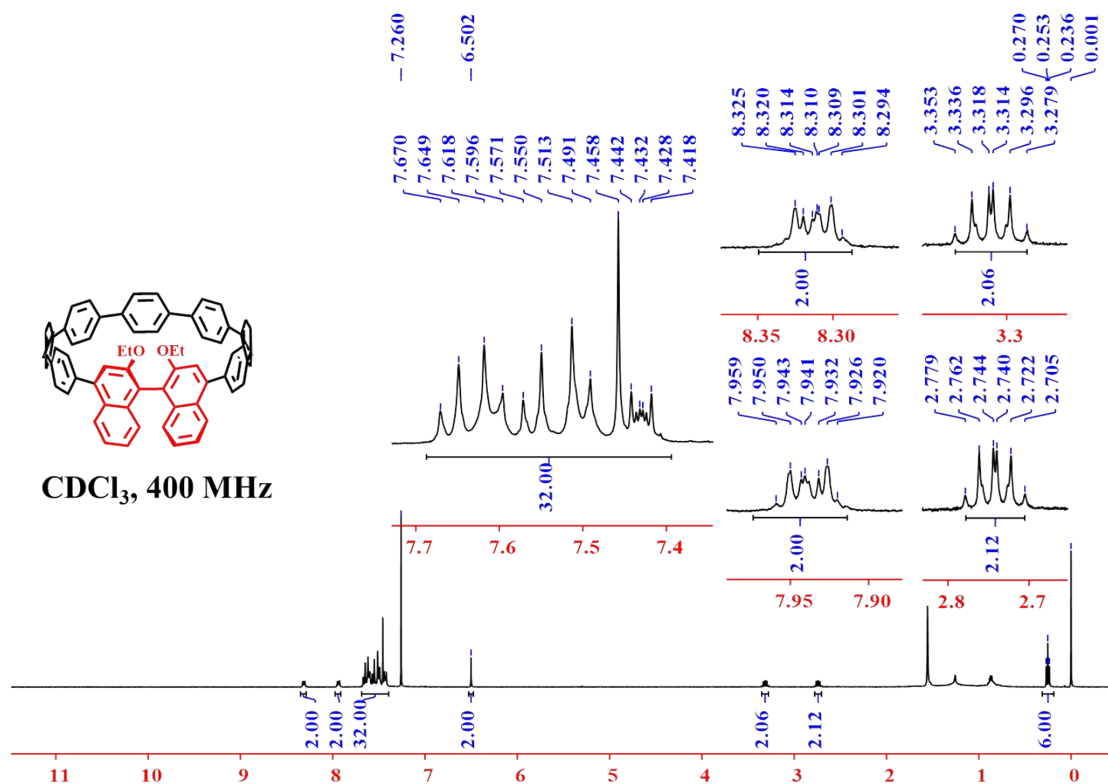

Figure S6. <sup>1</sup>H NMR spectrum of RCR.

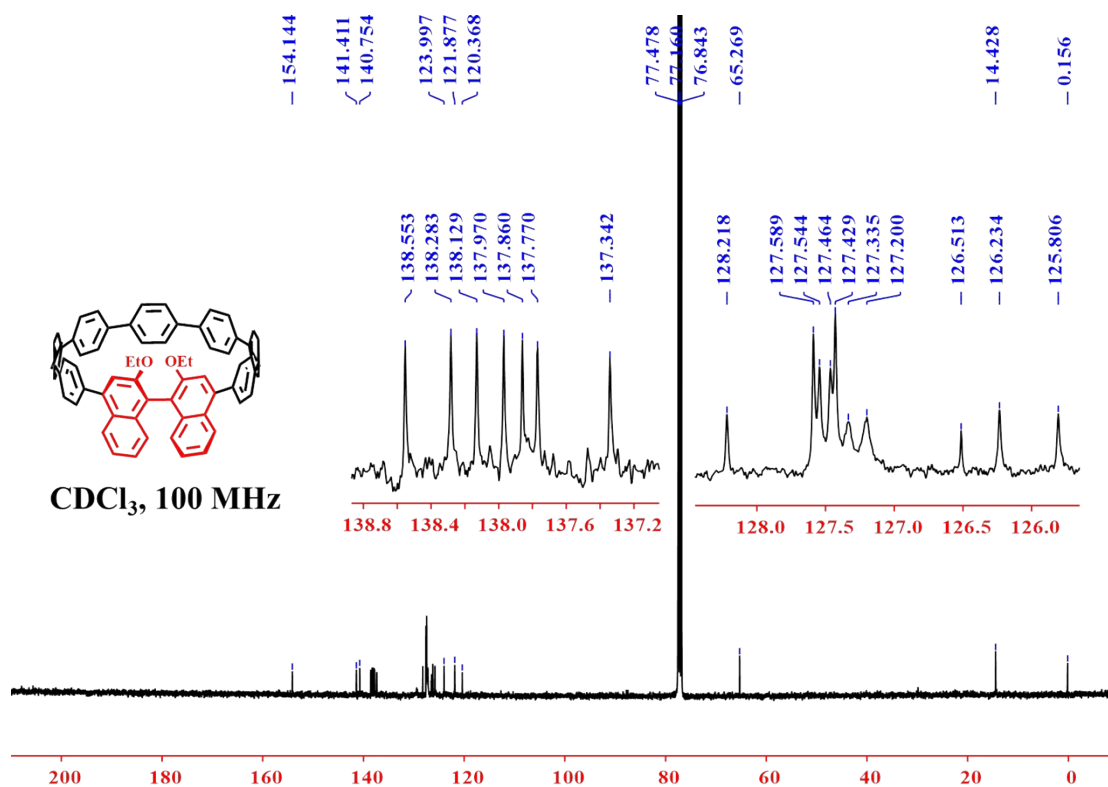

Figure S7. <sup>13</sup>C NMR spectrum RCR.

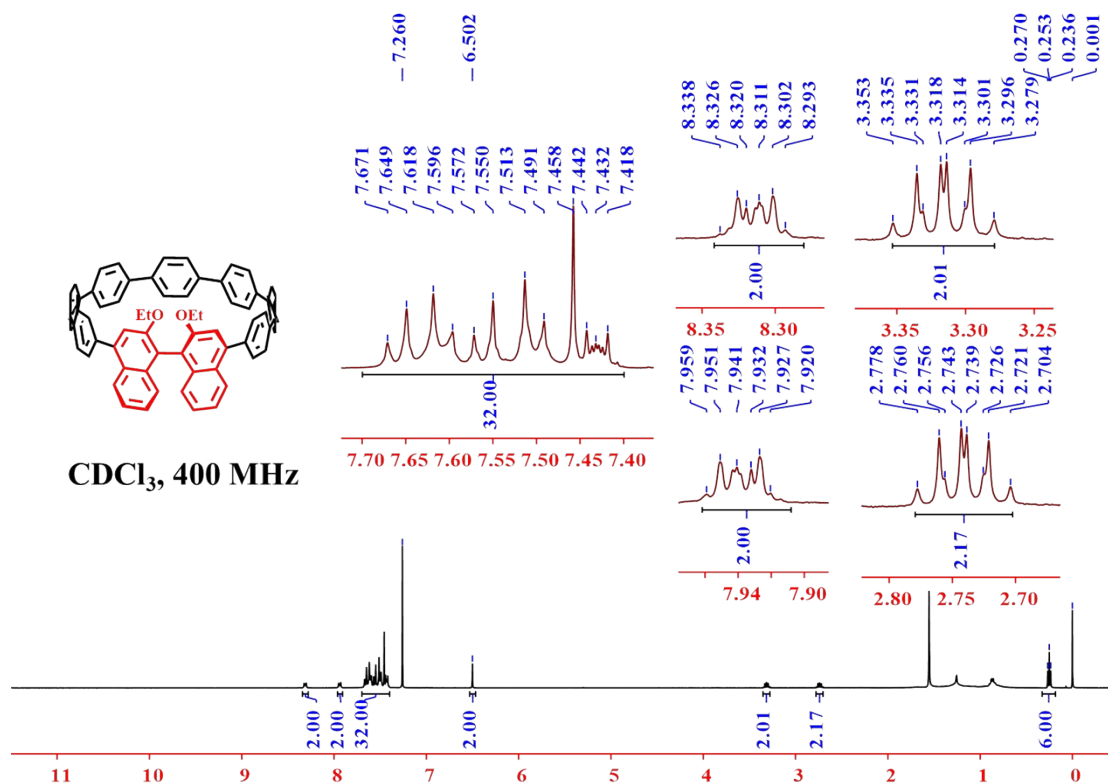

Figure S8. <sup>1</sup>H NMR spectrum of SCR.

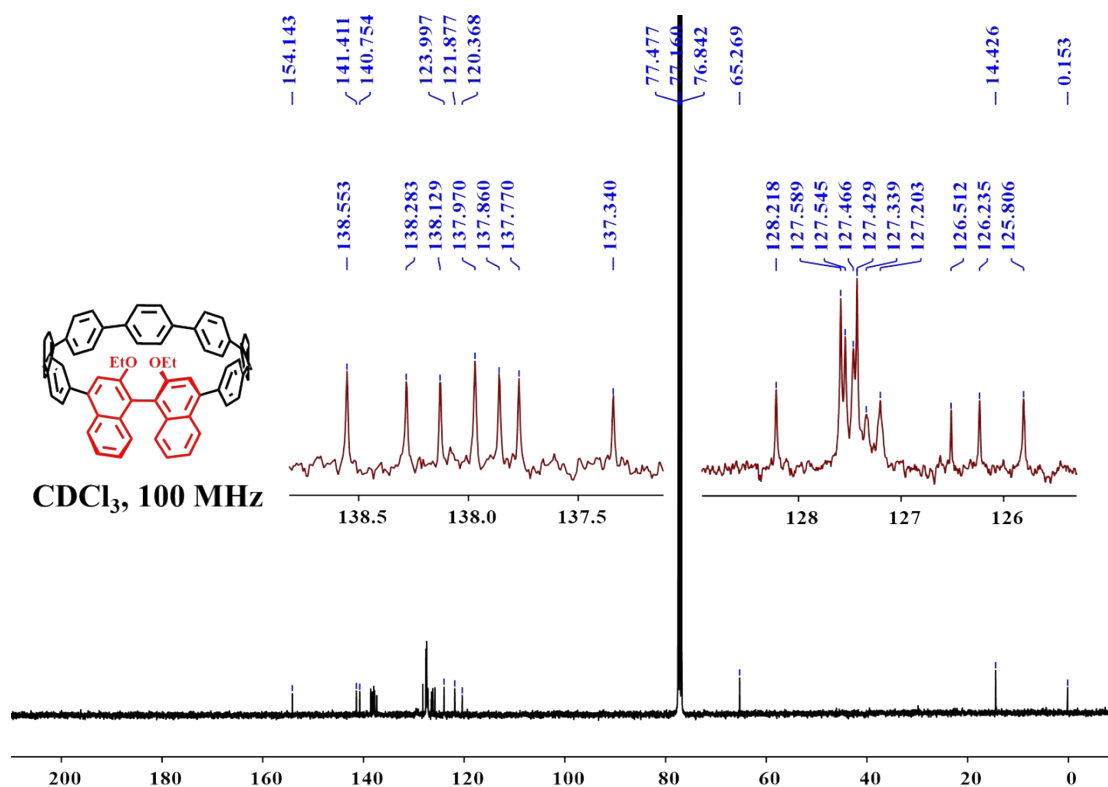

Figure S9. <sup>13</sup>C NMR spectrum SCR.

#### 4. Additional photophysical data



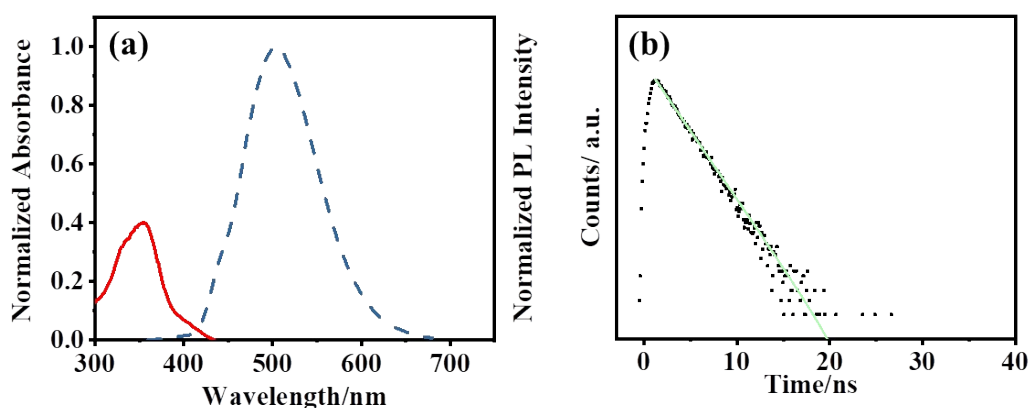

**Figure S10.** (a) UV-*vis* absorption (solid lines) and fluorescence spectra (dash lines) of SCR in CH<sub>2</sub>Cl<sub>2</sub> at 298 K. (b) Emission lifetime measured at 500 nm for SCR in CH<sub>2</sub>Cl<sub>2</sub>.

## Computational details

Geometrical optimization were carried out in the theoretical level of D3BJ-B3LYP/def2TZVP and further validated by frequency analysis. Transition states were located by QST3 strategy using the STQN method<sup>S4</sup> and further validated by frequency analysis (one imaginary frequency). For enantiomerization reaction path, intrinsic reaction coordinate (IRC)<sup>S5</sup> was further validated. All calculations were performed by using Gaussian 09 software.<sup>S6</sup>

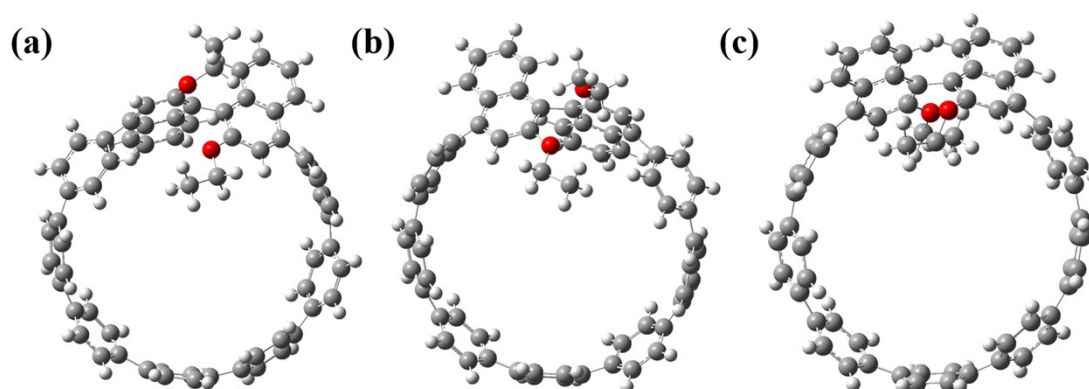

**Figure S11.** Relaxed structure of RCR (a), SCR (b) and TS (c).

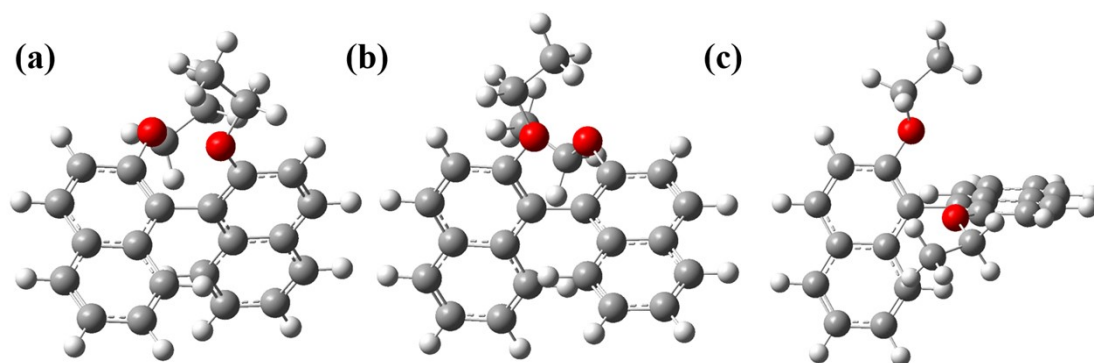

Figure S12. Relaxed structure of **5R** (a), **5S** (b) and **TS** (c).

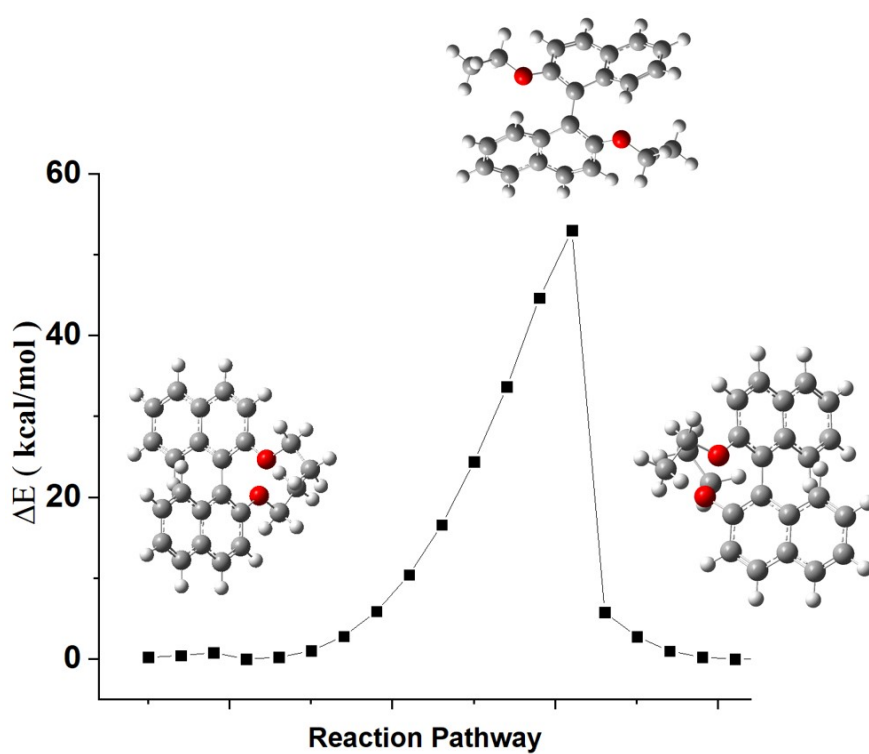

Figure S13. Energy barrier for the enantiomerization of **5**-(from **5R** to **5S**).

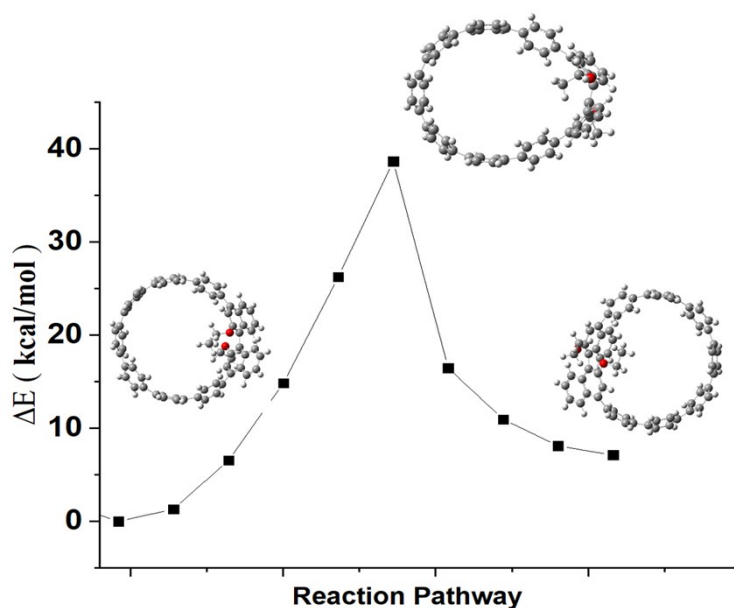

**Figure S14.** Energy barrier for the enantiomerization of **CR** (from **SCR** to **RCR**).

**Table S1** Energy level (unit: eV) of frontier molecular orbitals for **5** and **CR** under the theoretical level of B3LYP-D3BJ/def2TZVP

| Molecule | 5R       | 5S       | RCR      | SCR      |
|----------|----------|----------|----------|----------|
| LUMO+3   | -0.28436 | -0.28436 | -1.21118 | -1.20492 |
| LUMO+2   | -0.41007 | -0.41007 | -1.5282  | -1.50942 |
| LUMO+1   | -1.19186 | -1.19186 | -1.76331 | -1.68847 |
| LUMO     | -1.35078 | -1.35078 | -2.07461 | -1.99461 |
| HOMO     | -5.66055 | -5.66055 | -5.39497 | -5.28803 |
| HOMO-1   | -5.88015 | -5.88015 | -5.58218 | -5.61293 |
| HOMO-2   | -6.5403  | -6.5403  | -5.65184 | -5.62817 |
| HOMO-3   | -6.57105 | -6.57105 | -6.00097 | -5.9743  |
| GAP      | 4.30977  | 4.30977  | 3.32035  | 3.29341  |

**Table S2** Energy (Ha.) for strain energy calculations of **RCR** and **SCR** under the theoretical level of B3LYP-D3BJ/def2TZVP

|                 |              |
|-----------------|--------------|
| <b>Biphenyl</b> | -463.5204245 |
|-----------------|--------------|

|                                       |              |
|---------------------------------------|--------------|
| <b>Triphenyl</b>                      | -694.6848842 |
| <b>Fragment</b>                       | -1002.305718 |
| <b>RCR</b>                            | -2695.622544 |
| <b>SCR</b>                            | -2695.624642 |
| <b>RCR strain energy ( kcal/mol )</b> | 62.29        |
| <b>SCR strain energy ( kcal/mol )</b> | 60.97        |

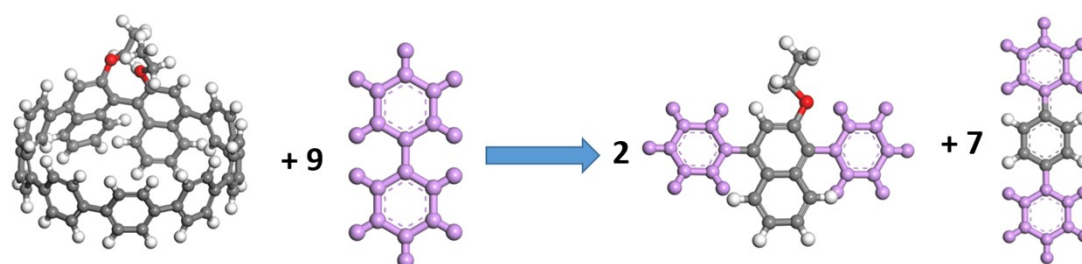

**Figure S14.** The calculation scheme of strain energy in **RCR** and **SCR**

**Table S3** relaxed structure of **CR, 5** and their transition state using theoretical level of D3-B3IYP/DEF2TZVP.

| <b>RCR</b> |           |           |           |   |           |           |           |
|------------|-----------|-----------|-----------|---|-----------|-----------|-----------|
| C          | 7.391083  | -0.113515 | 1.112928  | C | 6.365254  | 4.291315  | -0.861422 |
| C          | 7.369181  | -0.726331 | -0.146271 | C | 7.280626  | 1.260181  | 1.247333  |
| C          | 7.450095  | 0.124308  | -1.256318 | C | 7.113982  | 2.090624  | 0.130699  |
| C          | 7.099124  | -3.085668 | 0.745481  | C | 7.312478  | 1.494097  | -1.122125 |
| C          | 6.971391  | -2.142858 | -0.284320 | C | -1.446606 | -1.194973 | 3.146730  |
| C          | 5.429170  | -3.669616 | -1.369319 | C | -2.026997 | 0.073895  | 2.565385  |
| C          | 6.185644  | -2.514207 | -1.381872 | O | -3.092845 | -0.304938 | 1.699809  |
| C          | 6.339364  | -4.245891 | 0.758269  | O | -5.781086 | -2.025106 | 1.873697  |
| C          | 4.265958  | -5.437367 | -0.090438 | C | -7.804419 | -1.396916 | 2.946472  |
| C          | 5.413600  | -4.520834 | -0.257975 | C | -6.779375 | -1.000587 | 1.907333  |
| C          | 3.510520  | -5.875837 | -1.185711 | H | 7.377104  | -0.723456 | 2.006162  |
| C          | 2.390821  | -6.036467 | 1.328550  | H | 7.527069  | -0.294284 | -2.250689 |
| C          | 3.708752  | -5.639960 | 1.178810  | H | 7.756413  | -2.882984 | 1.581173  |
| C          | 1.561002  | -6.224839 | 0.215845  | H | 4.736746  | -3.837497 | -2.181753 |
| C          | 2.185712  | -6.249034 | -1.037479 | H | 6.054728  | -1.826262 | -2.204747 |
| C          | -0.413182 | -5.194063 | 1.283023  | H | 6.423448  | -4.916102 | 1.604042  |
| C          | 0.094023  | -6.055864 | 0.303605  | H | 3.928362  | -5.825020 | -2.182239 |
| C          | -2.044947 | -5.874688 | -0.838492 | H | 1.974826  | -6.095604 | 2.325472  |
| C          | -0.793961 | -6.464197 | -0.700572 | H | 4.271264  | -5.364914 | 2.060919  |
| C          | -1.658924 | -4.612350 | 1.147081  | H | 1.597018  | -6.438805 | -1.924958 |

|            |           |           |           |   |           |           |           |
|------------|-----------|-----------|-----------|---|-----------|-----------|-----------|
| C          | -3.496008 | -3.825115 | -0.247445 | H | 0.224824  | -4.863103 | 2.090207  |
| C          | -2.457560 | -4.854854 | 0.024784  | H | -2.677325 | -6.165386 | -1.667173 |
| C          | -3.342987 | -2.949315 | -1.377152 | H | -0.478607 | -7.198849 | -1.430389 |
| C          | -2.517595 | -3.260984 | -2.482830 | H | -1.970581 | -3.855543 | 1.852753  |
| C          | -2.928972 | -1.112072 | -3.467233 | H | -2.019746 | -4.215965 | -2.514254 |
| C          | -2.324462 | -2.377250 | -3.513431 | H | -2.773480 | -0.405562 | -4.272692 |
| C          | -5.023487 | -2.215910 | 0.762985  | H | -1.695460 | -2.651127 | -4.350567 |
| C          | -4.393374 | -3.482087 | 0.727481  | H | -4.542508 | -4.124147 | 1.585710  |
| C          | -4.727367 | -1.254406 | -0.182797 | H | -6.821206 | -0.245638 | -1.506358 |
| C          | -3.959483 | -1.659521 | -1.328669 | H | -4.149427 | 0.221978  | -2.367707 |
| C          | -6.593438 | 0.807424  | -1.406349 | H | -8.157133 | 1.432487  | -2.706112 |
| C          | -3.707704 | -0.760929 | -2.394994 | H | -5.756868 | 4.568824  | -1.055829 |
| C          | -7.332689 | 1.744677  | -2.077878 | H | -7.632028 | 3.850506  | -2.470719 |
| C          | -3.782915 | 0.643984  | 1.016445  | H | -2.599008 | 2.296706  | 1.694588  |
| C          | -4.750252 | 0.206032  | 0.121525  | H | -3.443866 | 4.401160  | -1.895212 |
| C          | -5.192055 | 2.577816  | -0.460431 | H | -1.105868 | 5.903603  | 2.166318  |
| C          | -5.514748 | 1.183617  | -0.567471 | H | -3.072088 | 4.493950  | 2.364242  |
| C          | -5.982807 | 3.516601  | -1.164017 | H | -1.535316 | 5.888100  | -2.096430 |
| C          | -7.031634 | 3.115896  | -1.950232 | H | 0.564616  | 7.199717  | 1.855084  |
| C          | -3.457375 | 2.005320  | 1.112248  | H | 2.951784  | 5.362968  | -2.036142 |
| C          | -3.357921 | 4.255590  | 0.248582  | H | 0.544497  | 5.556763  | -2.102356 |
| C          | -4.079939 | 2.964497  | 0.340159  | H | 2.985873  | 6.965009  | 1.930677  |
| C          | -2.963000 | 4.761190  | -0.995720 | H | 5.282771  | 5.869267  | -1.806417 |
| C          | -1.630345 | 5.617595  | 1.265250  | H | 5.750011  | 3.109773  | 2.239155  |
| C          | -2.742468 | 4.802434  | 1.380397  | H | 4.068772  | 4.839532  | 2.164251  |
| C          | -1.091824 | 5.939399  | 0.012216  | H | 7.003638  | 4.155346  | -1.723840 |
| C          | -1.859335 | 5.592214  | -1.107873 | H | 7.226568  | 1.675946  | 2.243938  |
| C          | 1.076058  | 6.793247  | 0.992682  | H | 7.249248  | 2.091967  | -2.020409 |
| C          | 0.335005  | 6.317999  | -0.099431 | H | -1.033751 | -1.820826 | 2.355835  |
| C          | 2.442270  | 5.806394  | -1.191119 | H | -2.214941 | -1.760741 | 3.674701  |
| C          | 1.063799  | 5.919137  | -1.226760 | H | -0.647452 | -0.951840 | 3.848814  |
| C          | 2.455076  | 6.665329  | 1.035837  | H | -2.407390 | 0.730772  | 3.354958  |
| C          | 4.485984  | 5.446836  | 0.147180  | H | -1.265982 | 0.622794  | 2.001593  |
| C          | 3.159595  | 6.074901  | -0.020750 | H | -8.572983 | -0.625443 | 3.021873  |
| C          | 5.388920  | 5.273231  | -0.908779 | H | -7.335116 | -1.511364 | 3.924524  |
| C          | 5.698085  | 3.733099  | 1.358332  | H | -8.282593 | -2.340555 | 2.681274  |
| C          | 4.734013  | 4.724303  | 1.318900  | H | -6.321151 | -0.042561 | 2.157301  |
| C          | 6.472780  | 3.420870  | 0.233829  | H | -7.231544 | -0.906519 | 0.917178  |
| <b>SCR</b> |           |           |           |   |           |           |           |
| C          | 6.835536  | -1.626986 | 1.190238  | C | 6.464192  | 2.265315  | -1.343129 |
| C          | 6.932923  | -2.415931 | 0.038561  | C | 7.063940  | -0.262121 | 1.145959  |
| C          | 7.464942  | -1.807948 | -1.106503 | C | 7.397896  | 0.376650  | -0.053102 |
| C          | 5.996824  | -4.494272 | 1.130177  | C | 7.691210  | -0.442238 | -1.151727 |
| C          | 6.215216  | -3.707161 | -0.008321 | C | -6.814406 | 2.150249  | 3.642878  |

---

|   |           |           |           |   |           |           |           |
|---|-----------|-----------|-----------|---|-----------|-----------|-----------|
| C | 4.446296  | -4.949341 | -1.108453 | C | -5.890024 | 2.865275  | 2.683636  |
| C | 5.478605  | -4.028562 | -1.153931 | O | -5.843287 | 2.098136  | 1.485099  |
| C | 4.963311  | -5.415840 | 1.175835  | O | -3.515373 | 0.337504  | 1.875287  |
| C | 2.739783  | -6.149663 | 0.227735  | C | -1.989919 | 1.108728  | 3.507191  |
| C | 4.101060  | -5.592248 | 0.085280  | C | -2.563863 | -0.116069 | 2.830718  |
| C | 2.014579  | -6.668672 | -0.853038 | H | 6.439671  | -2.058434 | 2.099616  |
| C | 0.646828  | -5.962207 | 1.436419  | H | 7.638197  | -2.400433 | -1.995645 |
| C | 2.028299  | -5.894849 | 1.405146  | H | 6.601567  | -4.336660 | 2.014033  |
| C | -0.091697 | -6.290320 | 0.293463  | H | 3.812765  | -5.063759 | -1.977551 |
| C | 0.630969  | -6.739675 | -0.820097 | H | 5.620349  | -3.451693 | -2.057657 |
| C | -2.301471 | -5.699741 | 1.355311  | H | 4.781823  | -5.958718 | 2.094588  |
| C | -1.506032 | -5.865940 | 0.213838  | H | 2.535027  | -6.958178 | -1.756991 |
| C | -3.089975 | -4.479778 | -0.995724 | H | 0.132601  | -5.618934 | 2.323454  |
| C | -1.990108 | -5.321228 | -0.981902 | H | 2.549167  | -5.502181 | 2.267846  |
| C | -3.393002 | -4.845817 | 1.346583  | H | 0.101942  | -7.084608 | -1.699081 |
| C | -4.444419 | -2.830469 | 0.259316  | H | -2.017122 | -6.180177 | 2.282535  |
| C | -3.742029 | -4.134318 | 0.192843  | H | -3.352082 | -3.968245 | -1.912038 |
| C | -5.369528 | -2.357879 | -0.711998 | H | -1.417756 | -5.438349 | -1.892077 |
| C | -6.064951 | -3.228643 | -1.583911 | H | -3.932127 | -4.660626 | 2.267237  |
| C | -7.136644 | -1.353198 | -2.649499 | H | -5.913544 | -4.294861 | -1.480019 |
| C | -6.931919 | -2.743282 | -2.527757 | H | -7.825515 | -0.975962 | -3.394477 |
| C | -4.136323 | -0.551935 | 1.054047  | H | -7.466301 | -3.425347 | -3.176177 |
| C | -3.933324 | -1.935885 | 1.177324  | H | -3.220893 | -2.299768 | 1.900409  |
| C | -4.863257 | -0.035513 | -0.011089 | H | -3.875107 | -0.248431 | -2.386955 |
| C | -5.581260 | -0.944973 | -0.830975 | H | -6.631742 | 0.586520  | -1.917765 |
| C | -3.386368 | 0.711160  | -2.414953 | H | -2.271345 | 0.211426  | -4.153124 |
| C | -6.476237 | -0.480318 | -1.826745 | H | -1.526368 | 4.081636  | -2.525001 |
| C | -2.481090 | 0.968802  | -3.408487 | H | -1.088653 | 2.403764  | -4.233246 |
| C | -4.920893 | 2.397883  | 0.534497  | H | -4.378679 | 4.338877  | 1.309150  |
| C | -4.606241 | 1.389216  | -0.355696 | H | -2.308707 | 6.151855  | -1.839647 |
| C | -3.023165 | 2.937315  | -1.472347 | H | 0.464214  | 4.815968  | 2.002881  |
| C | -3.709007 | 1.680042  | -1.428070 | H | -1.758859 | 3.876749  | 1.731770  |
| C | -2.070561 | 3.151845  | -2.499909 | H | -0.084441 | 7.124413  | -1.563080 |
| C | -1.814732 | 2.205585  | -3.455452 | H | 2.244380  | 5.994372  | 2.263321  |
| C | -4.223317 | 3.624073  | 0.514746  | H | 4.290570  | 5.605631  | -2.193252 |
| C | -2.173017 | 4.872352  | -0.117575 | H | 1.977966  | 6.295694  | -1.998487 |
| C | -3.235565 | 3.872499  | -0.409700 | H | 4.515514  | 5.183706  | 2.062922  |
| C | -1.707851 | 5.863095  | -0.986882 | H | 5.151481  | 3.681775  | -2.215507 |
| C | -0.146402 | 5.158133  | 1.179460  | H | 7.784425  | 2.458186  | 1.755576  |
| C | -1.408176 | 4.616375  | 1.024625  | H | 6.569850  | 4.566547  | 1.729359  |
| C | 0.409697  | 5.990124  | 0.200367  | H | 6.377281  | 1.604156  | -2.194578 |
| C | -0.441382 | 6.413450  | -0.829033 | H | 6.839617  | 0.332906  | 2.021066  |
| C | 2.680170  | 5.907627  | 1.276929  | H | 8.034440  | 0.005484  | -2.075609 |
| C | 1.883052  | 6.109851  | 0.143287  | H | -6.436065 | 1.151561  | 3.862579  |

---

|           |           |           |           |   |           |           |           |
|-----------|-----------|-----------|-----------|---|-----------|-----------|-----------|
| C         | 3.853394  | 5.679518  | -1.206761 | H | -7.811971 | 2.052623  | 3.213532  |
| C         | 2.538175  | 6.097655  | -1.094500 | H | -6.891968 | 2.709861  | 4.576706  |
| C         | 3.986128  | 5.464417  | 1.162783  | H | -6.256801 | 3.875006  | 2.469700  |
| C         | 5.690298  | 4.271613  | -0.216830 | H | -4.881755 | 2.950021  | 3.101317  |
| C         | 4.568006  | 5.227030  | -0.089813 | H | -1.257579 | 0.813171  | 4.260047  |
| C         | 5.762918  | 3.456852  | -1.353527 | H | -2.777117 | 1.682809  | 3.997574  |
| C         | 7.215144  | 2.725903  | 0.874459  | H | -1.496680 | 1.749796  | 2.776258  |
| C         | 6.520358  | 3.925177  | 0.859264  | H | -3.049285 | -0.773835 | 3.559731  |
| C         | 7.123422  | 1.821863  | -0.191780 | H | -1.775180 | -0.686357 | 2.329471  |
| <b>5R</b> |           |           |           |   |           |           |           |
| C         | -3.312350 | -0.496728 | 1.485796  | C | 2.373941  | -1.757387 | 2.522250  |
| C         | -3.192352 | 0.408418  | 0.406762  | C | 1.035919  | -1.067986 | 2.655949  |
| C         | -4.306322 | 1.124211  | -0.092277 | H | -5.269927 | 0.976919  | 0.380615  |
| C         | -2.918307 | 2.157224  | -1.764370 | H | -2.822265 | 2.830798  | -2.606344 |
| C         | -4.176382 | 1.982349  | -1.151765 | H | -5.036344 | 2.523962  | -1.523968 |
| C         | -0.958781 | -0.991501 | 1.349553  | H | -2.298800 | -1.885517 | 2.763709  |
| C         | -2.221731 | -1.182420 | 1.944955  | H | -0.096507 | 2.227164  | 1.125905  |
| C         | -0.786656 | -0.118940 | 0.294078  | H | -0.858159 | 1.619907  | -1.780156 |
| C         | -1.914455 | 0.594562  | -0.203365 | H | 1.307515  | 4.196046  | 1.502632  |
| C         | 0.890254  | 2.277952  | 0.688048  | H | 4.430898  | 2.478713  | -0.873043 |
| C         | -1.818525 | 1.481639  | -1.304016 | H | 3.576270  | 4.340008  | 0.500984  |
| C         | 1.677898  | 3.378994  | 0.896639  | H | 2.747452  | -1.732273 | -2.245185 |
| C         | 1.067290  | -1.003201 | -1.088919 | H | -1.154406 | -4.074334 | -2.207454 |
| C         | 0.557035  | 0.031773  | -0.322498 | H | -0.556102 | -4.467116 | -0.589580 |
| C         | 2.655606  | 1.275831  | -0.668655 | H | 0.100789  | -5.308174 | -2.006549 |
| C         | 1.346175  | 1.191855  | -0.103732 | H | 1.690162  | -3.557291 | -1.185828 |
| C         | 3.441017  | 2.429816  | -0.435171 | H | 1.104270  | -3.175168 | -2.816854 |
| C         | 2.967242  | 3.462247  | 0.328868  | H | 3.100808  | -1.300753 | 3.196686  |
| C         | 2.362895  | -0.920065 | -1.646838 | H | 2.744290  | -1.668448 | 1.500437  |
| C         | 3.131468  | 0.193569  | -1.437487 | H | 2.288685  | -2.815976 | 2.772295  |
| C         | -0.268751 | -4.350977 | -1.634630 | H | 1.110622  | -0.021402 | 2.357481  |
| C         | 0.802947  | -3.293211 | -1.770185 | H | 0.671608  | -1.101041 | 3.689109  |
| O         | 0.256852  | -2.072316 | -1.279765 | H | -4.283530 | -0.641678 | 1.942984  |
| O         | 0.089210  | -1.745826 | 1.814266  | H | 4.123729  | 0.252667  | -1.867831 |
| <b>5S</b> |           |           |           |   |           |           |           |
| C         | -3.131454 | 0.193457  | -1.437506 | C | 0.268860  | -4.351025 | -1.634441 |
| C         | -2.655636 | 1.275736  | -0.668672 | C | -0.802840 | -3.293275 | -1.770103 |
| C         | -3.441086 | 2.429696  | -0.435198 | H | -4.430967 | 2.478555  | -0.873073 |
| C         | -1.678002 | 3.378943  | 0.896607  | H | -1.307647 | 4.196014  | 1.502591  |
| C         | -2.967347 | 3.462149  | 0.328831  | H | -3.576405 | 4.339891  | 0.500938  |
| C         | -1.067245 | -1.003251 | -1.088900 | H | -2.747364 | -1.732375 | -2.245192 |
| C         | -2.362844 | -0.920155 | -1.646840 | H | 0.858130  | 1.619887  | -1.780181 |
| C         | -0.557026 | 0.031751  | -0.322493 | H | 0.096441  | 2.227174  | 1.125887  |
| C         | -1.346204 | 1.191808  | -0.103745 | H | 2.822212  | 2.830794  | -2.606401 |

|   |           |           |           |   |           |           |           |
|---|-----------|-----------|-----------|---|-----------|-----------|-----------|
| C | 1.818500  | 1.481646  | -1.304041 | H | 5.269916  | 0.977023  | 0.380589  |
| C | -0.890322 | 2.277926  | 0.688029  | H | 5.036300  | 2.524021  | -1.524027 |
| C | 2.918269  | 2.157240  | -1.764414 | H | 2.298847  | -1.885405 | 2.763762  |
| C | 0.958810  | -0.991446 | 1.349589  | H | -2.288827 | -2.815825 | 2.772016  |
| C | 0.786665  | -0.118916 | 0.294094  | H | -2.744231 | -1.668166 | 1.500204  |
| C | 3.192352  | 0.408488  | 0.406755  | H | -3.100888 | -1.300582 | 3.196449  |
| C | 1.914449  | 0.594597  | -0.203369 | H | -1.110523 | -0.021310 | 2.357517  |
| C | 4.306307  | 1.124288  | -0.092303 | H | -0.671743 | -1.101054 | 3.689135  |
| C | 4.176348  | 1.982401  | -1.151810 | H | -0.100636 | -5.308232 | -2.006378 |
| C | 2.221765  | -1.182330 | 1.944991  | H | 0.556124  | -4.467143 | -0.589365 |
| C | 3.312369  | -0.496631 | 1.485810  | H | 1.154561  | -4.074379 | -2.207193 |
| C | -2.373988 | -1.757211 | 2.522046  | H | -1.690088 | -3.557345 | -1.185792 |
| C | -1.035930 | -1.067916 | 2.655935  | H | -1.104100 | -3.175267 | -2.816795 |
| O | -0.089164 | -1.745777 | 1.814330  | H | -4.123712 | 0.252521  | -1.867862 |
| O | -0.256784 | -2.072355 | -1.279698 | H | 4.283555  | -0.641553 | 1.942996  |

**TS( RCR-SCR)**

|   |           |          |           |   |           |           |           |
|---|-----------|----------|-----------|---|-----------|-----------|-----------|
| C | -7.680200 | 0.447500 | 0.986200  | C | -6.547900 | -4.142900 | -0.533900 |
| C | -7.536000 | 0.988100 | -0.305000 | C | -7.579800 | -0.918200 | 1.213700  |
| C | -7.516000 | 0.068100 | -1.369700 | C | -7.296600 | -1.811000 | 0.164800  |
| C | -7.164100 | 3.338900 | 0.566700  | C | -7.381500 | -1.296300 | -1.140500 |
| C | -7.101700 | 2.397100 | -0.478900 | C | 2.560200  | 1.571100  | 3.077300  |
| C | -5.502900 | 3.866900 | -1.585300 | C | 2.686200  | 0.276500  | 2.268300  |
| C | -6.326800 | 2.749700 | -1.598400 | O | 4.047800  | -0.188900 | 2.367300  |
| C | -6.324300 | 4.447500 | 0.590300  | O | 3.521300  | 0.159600  | -1.855400 |
| C | -4.164500 | 5.471600 | -0.260400 | C | 2.392000  | -1.033100 | -3.538100 |
| C | -5.402600 | 4.679700 | -0.444700 | C | 2.553000  | 0.327500  | -2.884300 |
| C | -3.494700 | 6.106700 | -1.319900 | H | -7.753900 | 1.106500  | 1.843900  |
| C | -2.103300 | 5.601800 | 1.023000  | H | -7.498900 | 0.424200  | -2.394100 |
| C | -3.460800 | 5.322100 | 0.945700  | H | -7.819100 | 3.164900  | 1.413900  |
| C | -1.385100 | 6.059100 | -0.096000 | H | -4.816300 | 4.023800  | -2.410900 |
| C | -2.138500 | 6.404700 | -1.234200 | H | -6.252000 | 2.071000  | -2.439800 |
| C | 0.846100  | 5.660900 | 1.023700  | H | -6.333000 | 5.102900  | 1.456200  |
| C | 0.087800  | 5.883500 | -0.139900 | H | -4.026700 | 6.308700  | -2.244900 |
| C | 1.982800  | 5.043500 | -1.421600 | H | -1.575000 | 5.328600  | 1.929000  |
| C | 0.734900  | 5.650000 | -1.367200 | H | -3.948200 | 4.842000  | 1.788000  |
| C | 2.084200  | 5.029000 | 0.972400  | H | -1.646400 | 6.847900  | -2.093900 |
| C | 3.622800  | 3.505300 | -0.308300 | H | 0.428900  | 5.901100  | 1.995700  |
| C | 2.635400  | 4.613000 | -0.253100 | H | 2.416400  | 4.808700  | -2.388800 |
| C | 4.691300  | 3.315100 | 0.623100  | H | 0.213000  | 5.841800  | -2.298100 |
| C | 5.173600  | 4.362600 | 1.452400  | H | 2.577000  | 4.760000  | 1.899800  |
| C | 6.718100  | 2.844500 | 2.526300  | H | 4.760600  | 5.357300  | 1.326100  |
| C | 6.162400  | 4.137800 | 2.381800  | H | 7.494000  | 2.671100  | 3.265600  |
| C | 3.923700  | 1.211900 | -1.092500 | H | 6.524000  | 4.954000  | 2.999400  |
| C | 3.319200  | 2.477500 | -1.189800 | H | 2.484100  | 2.604000  | -1.864700 |



|   |           |           |           |   |           |           |           |
|---|-----------|-----------|-----------|---|-----------|-----------|-----------|
| C | 4.849800  | 0.933900  | -0.083300 | H | 6.595500  | 0.052300  | -1.906100 |
| C | 5.285000  | 2.009800  | 0.743100  | H | 6.721600  | 0.821600  | 1.824400  |
| C | 6.317000  | -0.995600 | -1.861400 | H | 7.344000  | -1.520200 | -3.660800 |
| C | 6.291700  | 1.812200  | 1.725700  | H | 5.308100  | -4.737500 | -1.667400 |
| C | 6.728500  | -1.872900 | -2.838700 | H | 6.701000  | -3.926800 | -3.536500 |
| C | 4.448900  | -1.028700 | 1.354800  | H | 3.431300  | -2.685600 | 2.243600  |
| C | 5.059400  | -0.509100 | 0.221500  | H | 2.887100  | -3.943300 | -1.803300 |
| C | 5.142200  | -2.811400 | -0.706000 | H | 1.523800  | -6.484500 | 2.207800  |
| C | 5.527800  | -1.432400 | -0.767900 | H | 3.601800  | -5.191000 | 2.238900  |
| C | 5.583500  | -3.689900 | -1.728900 | H | 0.786900  | -5.163000 | -1.818400 |
| C | 6.361400  | -3.235900 | -2.770900 | H | -0.564600 | -6.180400 | 2.481900  |
| C | 4.070800  | -2.386200 | 1.420000  | H | -3.290700 | -5.980700 | -1.626100 |
| C | 3.377900  | -4.413000 | 0.241300  | H | -0.899800 | -6.377700 | -1.799500 |
| C | 4.291200  | -3.249500 | 0.361600  | H | -2.972800 | -5.937900 | 2.657800  |
| C | 2.609100  | -4.524200 | -0.930700 | H | -5.504500 | -5.878100 | -1.228800 |
| C | 1.806900  | -5.926900 | 1.320900  | H | -5.819400 | -2.444000 | 2.303400  |
| C | 2.995400  | -5.202100 | 1.338000  | H | -4.123500 | -4.156100 | 2.458700  |
| C | 0.935500  | -5.875900 | 0.216700  | H | -7.219500 | -4.143400 | -1.387100 |
| C | 1.414000  | -5.228600 | -0.936900 | H | -7.621600 | -1.283000 | 2.234800  |
| C | -1.152400 | -6.182900 | 1.570700  | H | -7.216400 | -1.953200 | -1.988300 |
| C | -0.507200 | -6.205800 | 0.320800  | H | 2.282000  | 2.412100  | 2.438400  |
| C | -2.709800 | -6.069300 | -0.713900 | H | 3.528300  | 1.801000  | 3.528100  |
| C | -1.337800 | -6.268300 | -0.813200 | H | 1.818100  | 1.485600  | 3.875500  |
| C | -2.527300 | -6.018400 | 1.671800  | H | 2.013700  | -0.506900 | 2.642400  |
| C | -4.627100 | -5.131400 | 0.600400  | H | 2.445300  | 0.443500  | 1.213500  |
| C | -3.324600 | -5.834000 | 0.528100  | H | 1.675100  | -0.979800 | -4.362500 |
| C | -5.570300 | -5.130800 | -0.443900 | H | 2.032500  | -1.761500 | -2.806000 |
| C | -5.799500 | -3.219200 | 1.546300  | H | 3.353900  | -1.382100 | -3.922900 |
| C | -4.826400 | -4.201200 | 1.635100  | H | 1.600900  | 0.675100  | -2.460000 |
| C | -6.629700 | -3.109600 | 0.417300  | H | 2.896500  | 1.080600  | -3.606900 |

**TS(5R-5S)**

|   |           |           |           |   |           |           |           |
|---|-----------|-----------|-----------|---|-----------|-----------|-----------|
| C | 2.572900  | 2.402000  | -0.398300 | C | -2.795800 | 2.470800  | -2.284200 |
| C | 2.832100  | 1.354700  | 0.519000  | C | -1.315300 | 2.694900  | -2.038200 |
| C | 4.047900  | 1.285800  | 1.249100  | H | 4.795300  | 2.057700  | 1.085300  |
| C | 3.287900  | -0.723300 | 2.351100  | H | 3.470500  | -1.521300 | 3.064600  |
| C | 4.276400  | 0.269400  | 2.145600  | H | 5.209400  | 0.225900  | 2.698900  |
| C | 0.406300  | 1.458300  | -0.901900 | H | 1.211900  | 3.260400  | -1.803100 |
| C | 1.389300  | 2.460000  | -1.094600 | H | -1.156400 | 1.763800  | 1.292200  |
| C | 0.609800  | 0.411800  | -0.010300 | H | 1.349700  | -1.450900 | 1.820100  |
| C | 1.835100  | 0.343800  | 0.716100  | H | -3.333200 | 2.336800  | 2.292300  |
| C | -1.952300 | 1.028500  | 1.322800  | H | -4.782100 | -1.629800 | 1.487100  |
| C | 2.101400  | -0.687800 | 1.657200  | H | -5.161000 | 0.644600  | 2.387800  |
| C | -3.168900 | 1.344100  | 1.883600  | H | -1.137200 | -3.857300 | -0.622000 |
| C | -0.289500 | -1.887900 | -0.328500 | H | 2.996900  | -3.307700 | -2.049200 |

|   |           |           |           |   |           |           |           |
|---|-----------|-----------|-----------|---|-----------|-----------|-----------|
| C | -0.465200 | -0.603900 | 0.160900  | H | 2.724600  | -1.689300 | -2.716400 |
| C | -2.754700 | -1.236200 | 0.853500  | H | 2.407400  | -3.127500 | -3.715700 |
| C | -1.707300 | -0.262400 | 0.782700  | H | 0.261700  | -2.139000 | -2.834800 |
| C | -3.996500 | -0.880300 | 1.441600  | H | 0.530800  | -3.773700 | -2.196300 |
| C | -4.206300 | 0.383300  | 1.942100  | H | -3.263400 | 3.388600  | -2.653800 |
| C | -1.318200 | -2.858600 | -0.239900 | H | -3.288000 | 2.167900  | -1.356500 |
| C | -2.523600 | -2.534600 | 0.330600  | H | -2.943900 | 1.681600  | -3.026300 |
| C | 2.350500  | -2.716200 | -2.703300 | H | -1.157000 | 3.466100  | -1.272900 |
| C | 0.920200  | -2.746200 | -2.200000 | H | -0.807300 | 3.021800  | -2.956500 |
| O | 0.928400  | -2.206200 | -0.873800 | H | 3.329600  | 3.166800  | -0.549400 |
| O | -0.773400 | 1.452300  | -1.590000 | H | -3.316200 | -3.274900 | 0.394400  |

#### References:

- (S1) F. Z. Jin, C. C. Zhao, H. C. Ma, G. J. Chen and Y. B. Dong, Homochiral BINAPDA-Zr-MOF for Heterogeneous Asymmetric Cyanosilylation of Aldehydes, *Inorg. Chem.*, 2019, **58**, 9253-9259.
- (S2) S. J. Lee and W. Lin, A Chiral Molecular Square with Metallo-Corners for Enantioselective Sensing, *J. Am. Chem. Soc.*, 2002, **124**, 4554-4555.
- (S3) Q. Huang, G. Zhuang, H. Jia, M. Qian, S. Cui, S. Yang and P. Du, Photoconductive Curved-Nanographene/Fullerene Supramolecular Heterojunctions, *Angew. Chem., Int. Ed.*, 2019, **58**, 6244-6249.
- (S4) C. Peng, P. Y. Ayala, H. B. Schlegel and M. J. Frisch, Using Redundant Internal Coordinates to Optimize Equilibrium Geometries and Transition States, *J. Comp. Chem.*, 1996, **17**, 49.
- (S5) K. Fukui, The Path of Chemical Reactions-the IRC Approach, *Acc. Chem. Res.*, 1981, **14**, 363.
- (S6) Frisch, M. J. et al. ,Gaussian 09, RevisionA .01, Gaussian, Inc., Wallingford CT, 2009.
